# Supplementary material for: Boron nitride–Ag NWs/polyvinyl alcohol films with high thermal conductivity and excellent mechanical properties prepared via air/water interfacial assembly
Source: Royal Society of Chemistry journal article supplement (doi:10.1039/d4nj04217d), 2024-12-03
Supplement: d4nj04217d1.pdf [file d4nj04217d1.pdf]

## Supporting Information

### **Boron nitride-Ag NWs/polyvinyl alcohol films with high thermal conductivity and excellent mechanical properties by air/water interfacial assembly**

Zheng Nie, Xinyi Li, Fangjun Wu, Fujie Lai, Xudong Yang, Shaoyang Chen, Chao Yan, Yang Wang \*

*School of Materials Science and Engineering, Jiangsu University of Science and Technology, Zhenjiang, 212003, China*

\* *Corresponding author: Yang Wang (yangwang@just.edu.cn)*

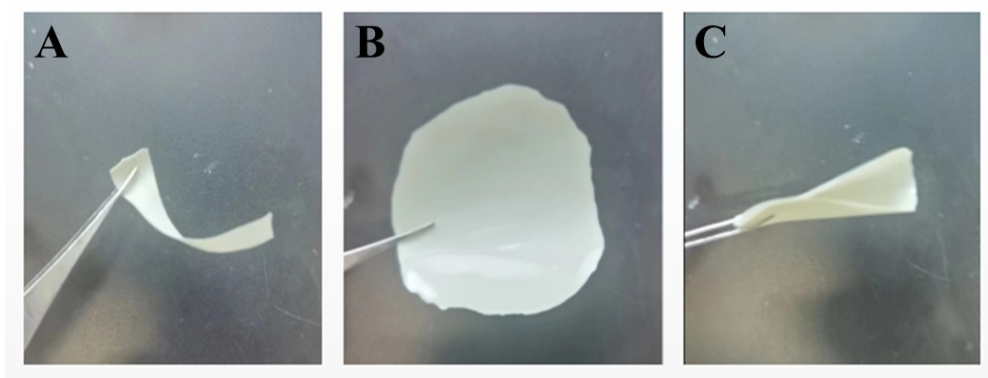

**Fig. S1** Optical pictures of BN-Ag NWs/PVA films and demonstration of the flexibility.

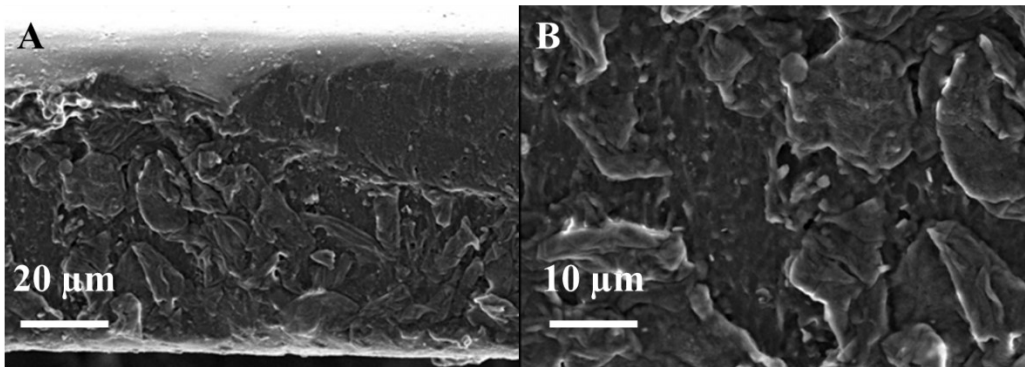

**Fig. S2** Cross-sectional morphology of BN-Ag NWs/PVA films in wide scope.

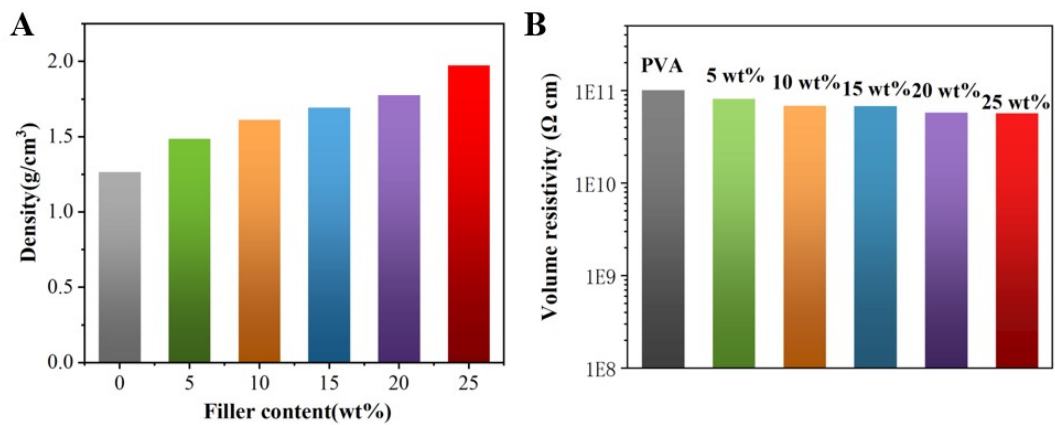

Fig. S3 (A) Density and (B) Volume resistivity of BN-Ag NWs/PVA films with different filler amounts.

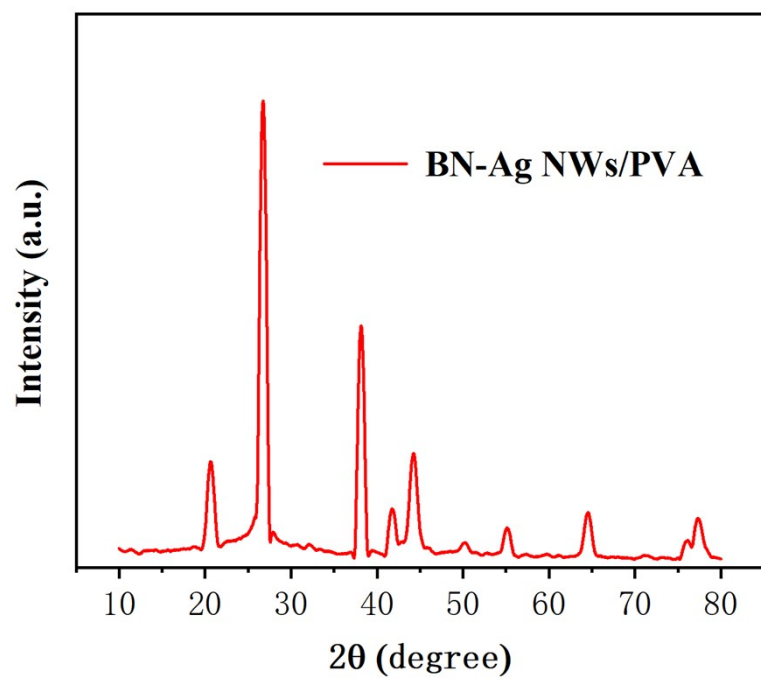

Fig. S4 XRD spectra of BN-Ag NWs/PVA.
